# Supplementary material
Source: Research Square preprint supplement (doi:10.21203/rs.3.rs-9709138/v1)
Supplement: Supplementary file 1 [file e248e60feddeecde05979eb4.docx]

**Highlights**

1.Ultrasonic vacuum drying (60 W, 30 °C, -90 kPa) significantly enhanced the drying rate of microwave pretreated coix seeds (750 W, 20 min, 1:2 w/v), representing the optimal process combination.

2.Page model predictions were accurate.

3.At 60 W, 30 °C, -90 kPa, hardness is lowest, rehydration ratio is highest, and cooking time is shortest; at 80 W, peak viscosity, storage modulus, and loss modulus are lowest.
